# Supplementary material for: “Light-assisted evaporation induced self-assembly”: an efficient approach toward ordered carbon materials
Source: Royal Society of Chemistry journal article supplement (doi:10.1039/c4ra14246b), 2014-12-10
Supplement: c4ra14246b1.pdf [file c4ra14246b1.pdf]

## **“Light-assisted evaporation induced self-assembly”: an efficient approach toward ordered carbon materials**

Camelia Matei Ghimbeu<sup>a,\*</sup>, Mihai Soprony<sup>b</sup>, Felix Sima<sup>b</sup>, Cyril Vaultot<sup>a</sup>, Loïc Vidal<sup>a</sup>, Jean-Marc Le Meins<sup>a</sup>, Luc Delmotte<sup>a</sup>

<sup>a</sup>Institut de Science des Matériaux de Mulhouse (IS2M), UMR 7361 CNRS, 15 rue Jean Starcky, BP 2488, 68057 Mulhouse cedex, France

<sup>b</sup>Lasers Department, National Institute for Lasers, Plasma and Radiation Physics, Atomistilor 409 bis, RO-77125, Magurele, Romania

\*Corresponding author:

E-mail: [camelia.ghimbeu@uha.fr](mailto:camelia.ghimbeu@uha.fr)

Tel : + 33 3 89 60 87 43

## I. Experimental part

### Synthesis

To accurately determine the irradiance used in the experiments, a calibration curve of the power vs. irradiation distance (UV lamp-liquid surface) was plotted. A power function profile was found as revealed in Fig. S1. To ensure reproducibility, the measurements were performed twice. From extrapolation, we found an average power of 6.76 mW at irradiation distance of 5.5 cm. Diameter of the brick was 5 cm while the irradiance at the liquid surface 0.34 mW/cm<sup>2</sup>.

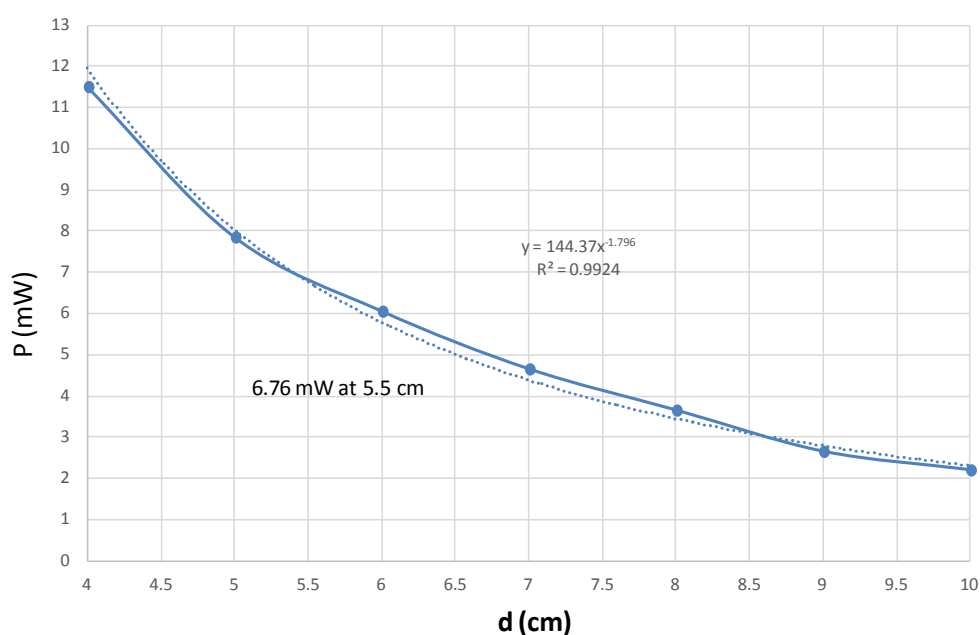

**Figure S1:** Correlation between the power lamp vs. irradiation distance

### Characterization

<sup>1</sup>H NMR relaxation experiments were performed on a Bruker Minispec MQ-20 spectrometer. The dead-time of the receiver and the duration of the 90° and 180° pulses were 9 μs, 3.4 and 7.8 μs, respectively. A solid echo pulse sequence, 90°x-tse-90°y-tse-[acquisition of the

amplitude of the transverse magnetization  $A(t)$ , with  $t_{se} = 9.5 \mu s$  was used to measure the free induction decay (FID). A Hahn echo pulse sequence,  $90^\circ x - t_{He} - 180^\circ x - t_{He}$  - [acquisition  $A(t)$  of the amplitude of an echo maximum], was used to record the slow part of the  $T_2$  relaxation decay for the soft domains of the samples, where  $t_{He}$  was varied between  $10 \mu s$  and  $10 ms$ . The Carr Purcell Meiboom Gill (CPMG) sequence was used to measure spin-spin relaxation time  $T_2$  for the soft domains exclusively. NMR signals were analyzed by using a discrete fitting method such as the Marquardt method (least-squares nonlinear regression technique).  $T_1$  experiments were carried on by inversion recovery sequence.

## II. Results

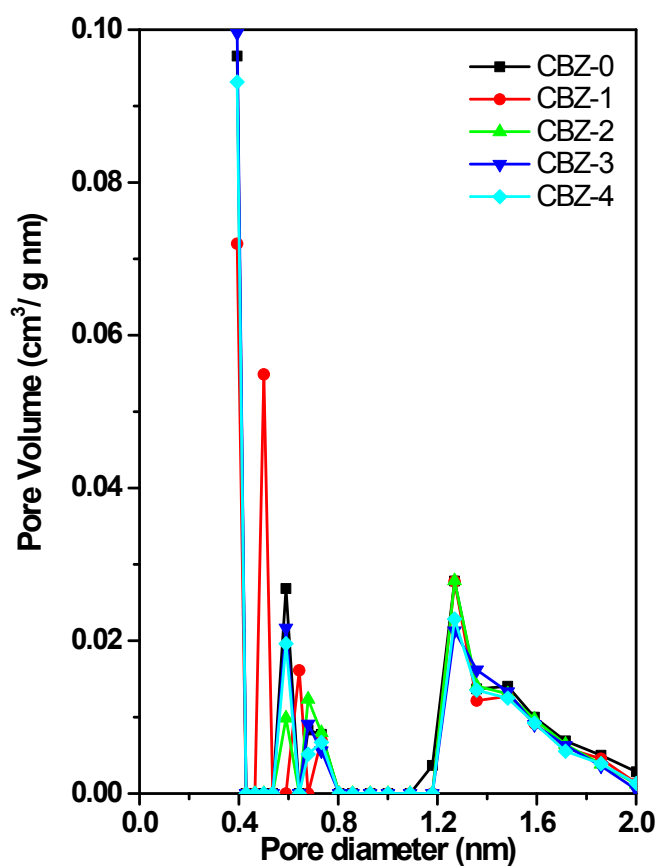

Figure S2: DFT micropore size distribution for carbon materials

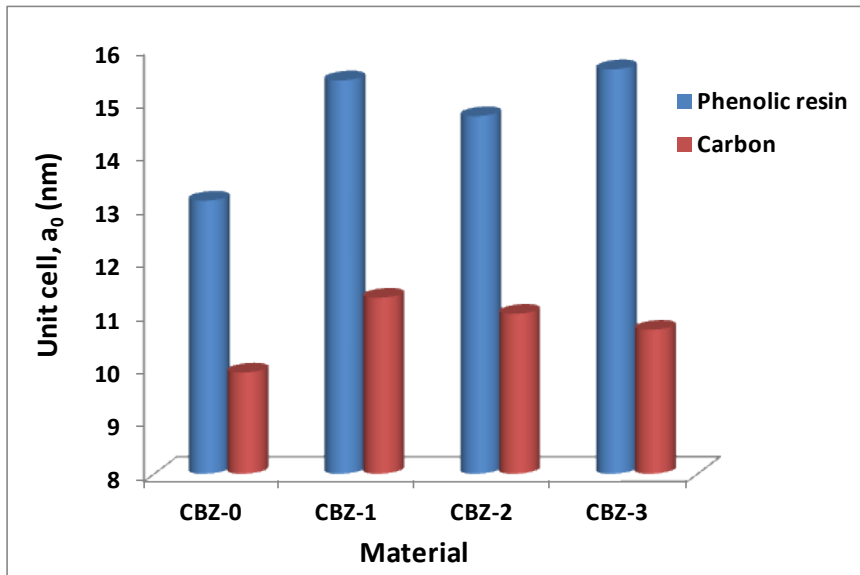

**Figure S3:** Unit cell parameters determined by SAXS measurements for phenolic resins and their corresponding carbons

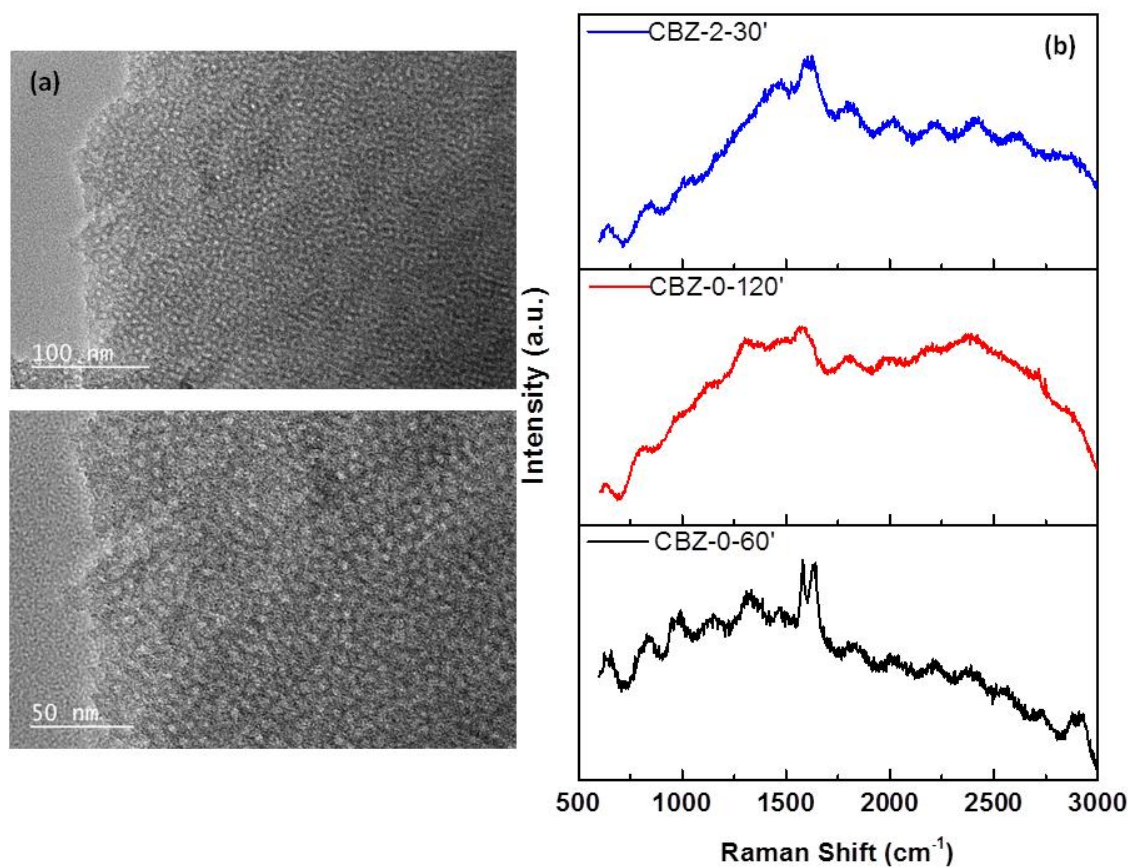

**Figure S4:** (a) TEM pictures and Raman spectra (b) of phenolic-resins synthesized in the absence of benzophenone by irradiation with light for 2h.
